# Supplementary material
Source: PubMed Central journal article supplement (PMC7887086)
Supplement: NIHMS1658157-supplement-1.pdf [file NIHMS1658157-supplement-1.pdf]

Comparison of morphine, oxycodone and the biased MOR agonist SR-17018 for tolerance and efficacy in mouse models of pain.

<sup>1</sup>Fani Pantouli, <sup>1</sup>Travis W. Grim, <sup>1</sup>Cullen L. Schmid, <sup>1</sup>Agnes Acevedo-Canabal, <sup>2</sup>Nicole M. Kennedy, <sup>2</sup>Thomas D. Bannister, <sup>1</sup>Laura M. Bohn\*

<sup>1</sup>Departments of Molecular Medicine and Neuroscience, <sup>2</sup>Molecular Medicine and Chemistry, The Scripps Research Institute, Jupiter, FL

\*Corresponding PI:

Laura M. Bohn, PhD. [LBohn@scripps.edu](mailto:LBohn@scripps.edu); TSRI, 130 Scripps Way, Jupiter FL 33458

SFigure 1A is provided to demonstrate SR-17018 potency by oral administration in the tail flick test wherein an ED<sub>50</sub> value is calculated from the response at 1 hour for comparison to other studies in this manuscript. SFigure 1B provides the tolerance data from the SR-17018-treated female mice in the tail flick assay (ED<sub>50</sub> values included in Table 1). SFigure 2 provides a visual representation of plasma levels measured following the indicated doses of oxycodone, buprenorphine, SR-17018 and morphine at 1, 12 and 24 hours after injection.

Grim, T. W., Schmid, C. L., Stahl, E. L., Pantouli, F., Ho, J. H., Acevedo-Canabal, A., Kennedy, N. M., Cameron, M. D., Bannister, T. D., Bohn, L. M., 2020. A G protein signaling-biased agonist at the mu-opioid receptor reverses morphine tolerance while preventing morphine withdrawal. *Neuropsychopharmacology* 45, 416-425.

**A.**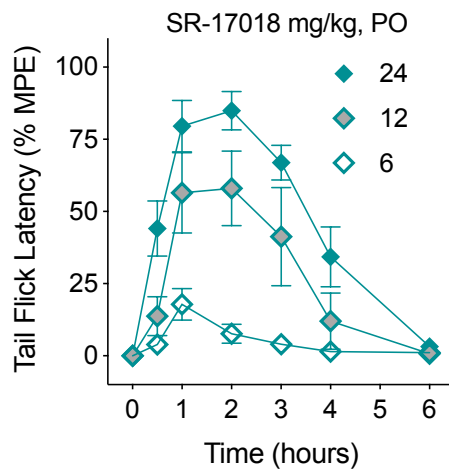**B.**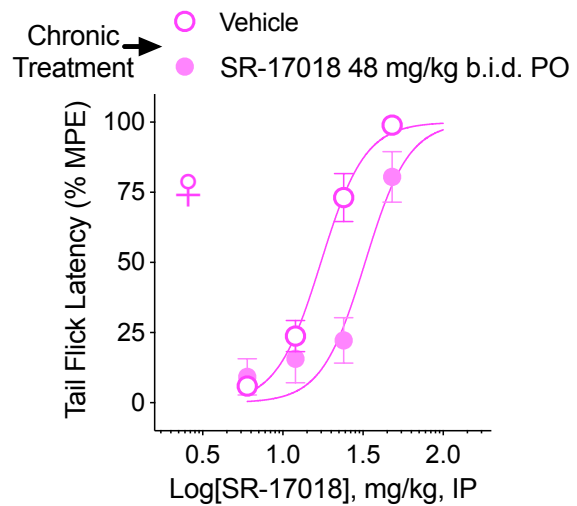

**Supplemental Figure 1. A.** Male C57BL6/J mice: Dose response over time for oral (p.o.) dosing in the warm water (49°C) tail immersion assay ( $ED_{50}$ : 8.5 (5.2–13.12) mg/kg,  $n=5$  at 6 & 12;  $n=13$  at 24 mg/kg, PO), %MPE is  $100\% \times [(response\ sec - baseline\ sec)/(30\ sec - baseline)]$  where the average baseline was  $2.62 \pm 0.11$  sec (mean with s.e.m.) for this group of mice. **B.** Female C57BL6/J mice were assessed for tail flick response 1 hour following intraperitoneal (IP) injection of SR-17018 following chronic treatment with vehicle (PO., b.i.d.) or 48 mg/kg/day SR-17018 (PO., b.i.d.) for 6 days. The baseline taken 15h after the last dose of vehicle was:  $1.65 \pm 0.11$  sec and after SR-17018:  $1.67 \pm 0.11$  sec. Potencies are provided in Table 1 of the text.

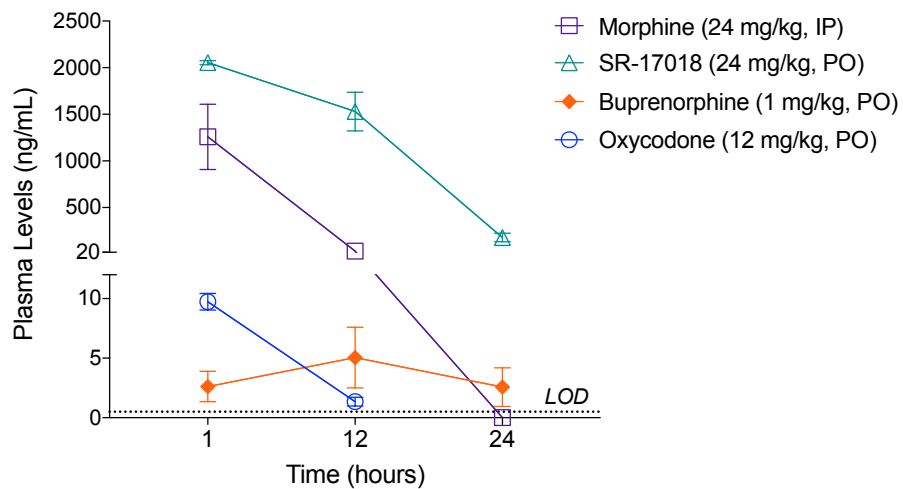

**Supplemental Figure 2.** C57BL6/J male mouse plasma levels were measured by LC/MS at 1, 12 or 24 hours post drug administration. Shown are means with  $\pm$  s.e.m. Oxycodone: n=3 (not measured at 24 h); SR-17018: n=3 @ 1, 24h; n=10@ 12 h; buprenorphine: n=7 @ 1, 12 h; n=4 @ 24h; morphine: n=3 @ 1, 12 h; n= 4 @ 24 h. *LOD: limit of detection.* The data for oxycodone is from (Grim et al., 2020); the oxycodone metabolite levels can be found in the reference. For SR-17018, 7 mice from the 12 h point were published in (Grim et al., 2020) while additional mice (n=3) were added for the 1-, 12- and 24-hours points shown here. Morphine levels following SC osmotic pump administration can be found in Grim et al., 2020.
